# Supplementary material for: Associations of Diet and Physical Activity with Risk for Gestational Diabetes Mellitus: A Systematic Review and Meta-Analysis
Source: PubMed Central journal article supplement (PMC6024719; doi:10.3390/nu10060698), 2018-05-30
Supplement: nutrients-10-00698-s001.pdf [file nutrients-10-00698-s001.pdf]

## Supplementary Materials

Table S1. Search terms according to PICO formatting.

| Aspect of PICO                                | No. | Term                                                                           |
|-----------------------------------------------|-----|--------------------------------------------------------------------------------|
| Population                                    | 1   | Pregnant                                                                       |
|                                               | 2   | Pregnancy/                                                                     |
|                                               | 3   | Pregnant women/                                                                |
|                                               | 4   | Gestation\$                                                                    |
|                                               | 5   | Maternal                                                                       |
|                                               | 6   | 1 or 2 or 3 or 4 or 5                                                          |
| Intervention/ Observation (Food and Exercise) | 7   | Food intake/                                                                   |
|                                               | 8   | Food consumption                                                               |
|                                               | 9   | Food habits                                                                    |
|                                               | 10  | Food analysis                                                                  |
|                                               | 11  | Dietary intake                                                                 |
|                                               | 12  | Macronutrient\$.mp (dietary fat/ or dietary protein/ or dietary carbohydrate/) |
|                                               | 13  | Calorie intake                                                                 |
|                                               | 14  | Energy intake                                                                  |
|                                               | 15  | Kilojoule intake                                                               |
|                                               | 16  | Glycemic index                                                                 |
|                                               | 17  | Glycaemic index                                                                |
|                                               | 18  | Glycemic load                                                                  |
|                                               | 19  | Glycaemic load                                                                 |
|                                               | 20  | Sugar\$                                                                        |
|                                               | 21  | Potato                                                                         |
|                                               | 22  | White bread                                                                    |
|                                               | 23  | Soft drink\$                                                                   |
|                                               | 24  | Sugar sweetened beverage\$                                                     |
|                                               | 25  | Soda                                                                           |
|                                               | 26  | Soda pop                                                                       |
|                                               | 27  | Carbonated drink                                                               |
|                                               | 28  | Carbonated beverages                                                           |
|                                               | 29  | Meat                                                                           |
|                                               | 30  | Meat products                                                                  |
|                                               | 31  | Meat intake                                                                    |
|                                               | 32  | Red meat                                                                       |
|                                               | 33  | Processed meat                                                                 |
|                                               | 34  | Dairy                                                                          |
|                                               | 35  | Dairy products                                                                 |
|                                               | 36  | Saturated fat                                                                  |
|                                               | 37  | Processed food\$                                                               |
|                                               | 38  | Pre-packaged food\$                                                            |
|                                               | 39  | Fast food                                                                      |

|                                |    |                                                                                                                                                                                                                                                                                           |
|--------------------------------|----|-------------------------------------------------------------------------------------------------------------------------------------------------------------------------------------------------------------------------------------------------------------------------------------------|
|                                | 40 | Energy dense food\$                                                                                                                                                                                                                                                                       |
|                                | 41 | Convenience food                                                                                                                                                                                                                                                                          |
|                                | 42 | Discretionary food\$                                                                                                                                                                                                                                                                      |
|                                | 43 | Discretionary snack\$                                                                                                                                                                                                                                                                     |
|                                | 44 | Snack\$                                                                                                                                                                                                                                                                                   |
|                                | 45 | Physical Activity                                                                                                                                                                                                                                                                         |
|                                | 46 | Exercise                                                                                                                                                                                                                                                                                  |
|                                | 47 | Movement                                                                                                                                                                                                                                                                                  |
|                                | 48 | Body movement                                                                                                                                                                                                                                                                             |
|                                | 49 | Pedometer                                                                                                                                                                                                                                                                                 |
|                                | 50 | Active minutes                                                                                                                                                                                                                                                                            |
|                                | 51 | Leisure time                                                                                                                                                                                                                                                                              |
|                                | 52 | Resistance training                                                                                                                                                                                                                                                                       |
|                                | 53 | Energy expenditure                                                                                                                                                                                                                                                                        |
|                                | 54 | Energy metabolism                                                                                                                                                                                                                                                                         |
|                                | 55 | 7 or 8 or 9 or 10 or 11 or 12 or 13 or 14 or 15 or 16 or 17 or 18 or 19 or 20 or 21 or 22 or 23 or 24 or 25 or 26 or 27 or 28 or 29 or 30 or 31 or 32 or 33 or 34 or 35 or 36 or 37 or 38 or 39 or 40 or 41 or 42 or 43 or 44 or 45 or 46 or 47 or 48 or 49 or 50 or 51 or 52 or 53 or 54 |
| <b>Outcome</b>                 | 56 | Gestational diabetes mellitus                                                                                                                                                                                                                                                             |
|                                | 57 | Gestational diabetes                                                                                                                                                                                                                                                                      |
|                                | 58 | 57 or 58                                                                                                                                                                                                                                                                                  |
| <b>Study type, Limitations</b> | 59 | Cohort                                                                                                                                                                                                                                                                                    |
|                                | 60 | Longitudinal                                                                                                                                                                                                                                                                              |
|                                | 61 | Prospective                                                                                                                                                                                                                                                                               |
|                                | 62 | 60 or 61 or 62                                                                                                                                                                                                                                                                            |
|                                | 63 | Limit 63: English language, female, human and year limit (1985 – present)                                                                                                                                                                                                                 |

**Table S2** – Modified quality assessment & risk of bias form obtained from the Evidence Analysis Manual: Steps in the academy evidence analysis process.

| Author, Year                        | Research question clearly stated | Participants representative of a GDM population | Response Rate | Attrition Rate | Exposure level described | Diet or PA assessment tools validated | Method of GDM diagnosis stated | Appropriate statistical analysis | Confounding factors adjusted | Discussion of findings, bias(es) & study limitations identified & discussed | Funding or sponsorship bias unlikely | Quality Rating |
|-------------------------------------|----------------------------------|-------------------------------------------------|---------------|----------------|--------------------------|---------------------------------------|--------------------------------|----------------------------------|------------------------------|-----------------------------------------------------------------------------|--------------------------------------|----------------|
| Adeney et al. 2007 [38]             | Y                                | Y                                               | *             | Y              | Y                        | X                                     | Y                              | Y                                | Y                            | Y                                                                           | Y                                    | Neutral        |
| Badon et al. 2016 [39]              | Y                                | Y                                               | NA            | NA             | Y                        | N                                     | Y                              | Y                                | Not energy                   | Y                                                                           | Y                                    | Neutral        |
| Bao et al. 2013 [24]                | Y                                | Y                                               | NA            | NA             | Y                        | Y                                     | Y                              | Y                                | Y                            | Y                                                                           | Y                                    | Positive       |
| Bao et al. 2014a [25]               | Y                                | Y                                               | NA            | NA             | Y                        | Y                                     | Y                              | Y                                | Y                            | Y                                                                           | Y                                    | Positive       |
| Bao et al. 2014b [26]               | Y                                | Y                                               | NA            | NA             | Y                        | Y                                     | Y                              | Y                                | Y                            | Y                                                                           | Y                                    | Positive       |
| Bao et al. 2016 [27]                | Y                                | Y                                               | NA            | NA             | Y                        | Y                                     | Y                              | Y                                | Y                            | Y                                                                           | Y                                    | Positive       |
| Baptiste-Robert et al. 2011 [51]    | Y                                | Y                                               | Y             | NA             | Y                        | Y                                     | Y                              | Y                                | Not energy                   | Y                                                                           | Y                                    | Positive       |
| Behboudi-Gandevani et al. 2013 [57] | Y                                | *                                               | X             | X              | Y                        | Y                                     | Y                              | Y                                | Not energy                   | Y                                                                           | *                                    | Neutral        |
| Bowers et al. 2011 [28]             | Y                                | Y                                               | NA            | NA             | Y                        | Y                                     | Y                              | Y                                | Y                            | Y                                                                           | Y                                    | Positive       |
| Bowers et al. 2012 [29]             | Y                                | Y                                               | NA            | NA             | Y                        | Y                                     | Y                              | Y                                | Y                            | Y                                                                           | Y                                    | Positive       |
| Chasan-Taber et al. 2008 [56]       | Y                                | Y                                               | Y             | Y              | Y                        | Y                                     | Y                              | Y                                | Not energy                   | Y                                                                           | Y                                    | Positive       |
| Chasan-Taber et al. 2014 [55]       | Y                                | Y                                               | Y             | Y              | Y                        | Y                                     | Y                              | Y                                | Not energy                   | Y                                                                           | Y                                    | Positive       |
| Chen et al. 2009 [30]               | Y                                | Y                                               | NA            | NA             | Y                        | Y                                     | Y                              | Y                                | Not energy                   | Y                                                                           | Y                                    | Neutral        |
| Chen et al. 2012 [31]               | Y                                | Y                                               | NA            | NA             | Y                        | Y                                     | Y                              | Y                                | Not energy                   | Y                                                                           | Y                                    | Neutral        |
| Currie et al. 2014 [59]             | Y                                | Y                                               | Y             | Y              | Y                        | Y                                     | Y                              | Y                                | Not Energy                   | Y                                                                           | Y                                    | Positive       |
| Dempsey et al. 2004 [40]            | Y                                | Y                                               | Y             | Y              | Y                        | X                                     | Y                              | Y                                | Not Energy                   | Y                                                                           | Y                                    | Positive       |
| Dominguez et al. 2014 [62]          | Y                                | Y                                               | Y             | X              | Y                        | Y                                     | Y                              | Y                                | Y                            | Y                                                                           | *                                    | Neutral        |
| Dye et al. 1997 [52]                | Y                                | Y                                               | Y             | Y              | Y                        | X                                     | Y                              | Y                                | Not Energy                   | Y                                                                           | Y                                    | Positive       |
| Gresham et al. 2016 [45]            | Y                                | Y                                               | Y             | *              | Y                        | Y                                     | Y                              | Y                                | Y                            | Y                                                                           | Y                                    | Positive       |
| Harrison et al. 2012 [54]           | Y                                | X                                               | Y             | Y              | Y                        | Y                                     | Y                              | Y                                | Not Energy                   | Y                                                                           | Y                                    | Positive       |
| Hinkle et al. 2015 [58]             | Y                                | Y                                               | Y             | Y              | Y                        | *                                     | *                              | Y                                | Not Energy                   | Y                                                                           | *                                    | Neutral        |
| Iqbal et al. 2007 [60]              | Y                                | Y                                               | Y             | Y              | Y                        | Y                                     | Y                              | Y                                | Not Energy                   | Y                                                                           | Y                                    | Positive       |
| Karamanos et al. 2014 [63]          | Y                                | Y                                               | Y             | X              | Y                        | Y                                     | Y                              | Y                                | Y                            | Y                                                                           | Y                                    | Positive       |
| Morkrid et al. 2007 [61]            | Y                                | Y                                               | Y             | Y              | Y                        | Y                                     | Y                              | Y                                | Not Energy                   | Y                                                                           | Y                                    | Positive       |
| Oken et al. 2006 [49]               | Y                                | Y                                               | Y             | Y              | Y                        | Y                                     | Y                              | Y                                | Not Energy                   | Y                                                                           | Y                                    | Positive       |
| Osorio-Yanez et al. 2016 [41]       | Y                                | Y                                               | Y             | Y              | Y                        | Y                                     | Y                              | Y                                | Y                            | Y                                                                           | Y                                    | Positive       |
| Putnam et al. 2013 [53]             | Y                                | Y                                               | Y             | X              | Y                        | Y                                     | Y                              | Y                                | Not Energy                   | Y                                                                           | Y                                    | Positive       |
| Qiu et al. 2011a [42]               | Y                                | Y                                               | Y             | Y              | Y                        | Y                                     | Y                              | Y                                | Y                            | Y                                                                           | Y                                    | Positive       |
| Qiu et al. 2011b [43]               | Y                                | Y                                               | X             | Y              | Y                        | Y                                     | Y                              | Y                                | Y                            | Y                                                                           | Y                                    | Positive       |
| Radesky et al. 2008 [50]            | Y                                | Y                                               | Y             | Y              | Y                        | Y                                     | Y                              | Y                                | Not Energy                   | Y                                                                           | *                                    | Neutral        |
| Rudra et al. 2006 [44]              | Y                                | Y                                               | Y             | X              | Y                        | Y                                     | Y                              | Y                                | Not Energy                   | Y                                                                           | Y                                    | Neutral        |

| Author, Year                   | Research question clearly stated | Participants representative of a GDM population | Response Rate | Attrition Rate | Exposure level described | Diet or PA assessment tools validated | Method of GDM diagnosis stated | Appropriate statistical analysis | Confounding factors adjusted | Discussion of findings, bias(es) & study limitations identified & discussed | Funding or sponsorship bias unlikely | Quality Rating |
|--------------------------------|----------------------------------|-------------------------------------------------|---------------|----------------|--------------------------|---------------------------------------|--------------------------------|----------------------------------|------------------------------|-----------------------------------------------------------------------------|--------------------------------------|----------------|
| Schoenacker et al. 2015 [47]   | Y                                | Y                                               | Y             | Y              | Y                        | Y                                     | Y                              | Y                                | Y                            | Y                                                                           | Y                                    | Positive       |
| Schoenacker et al. 2016 [46]   | Y                                | Y                                               | Y             | Y              | Y                        | Y                                     | Y                              | Y                                | Y                            | Y                                                                           | Y                                    | Positive       |
| Solomon et al. 1997 [32]       | Y                                | Y                                               | Y             | X              | Y                        | X                                     | Y                              | Y                                | Not Energy                   | Y                                                                           | Y                                    | Neutral        |
| Tobias et al. 2012 [33]        | Y                                | Y                                               | NA            | NA             | Y                        | Y                                     | Y                              | Y                                | Y                            | Y                                                                           | Y                                    | Positive       |
| Van der Ploeg et al. 2011 [48] | Y                                | Y                                               | Y             | X              | Y                        | Y                                     | Y                              | Y                                | Not Energy                   | Y                                                                           | Y                                    | Neutral        |
| Zhang et al. 2006a [34]        | Y                                | Y                                               | NA            | NA             | Y                        | Y                                     | Y                              | Y                                | Y                            | Y                                                                           | Y                                    | Positive       |
| Zhang et al. 2006b [35]        | Y                                | Y                                               | NA            | NA             | Y                        | Y                                     | Y                              | Y                                | Y                            | Y                                                                           | Y                                    | Positive       |
| Zhang et al. 2006c [36]        | Y                                | Y                                               | NA            | NA             | Y                        | Y                                     | Y                              | Y                                | Y                            | Y                                                                           | Y                                    | Positive       |
| Zhang et al. 2014 [37]         | Y                                | Y                                               | NA            | NA             | Y                        | Y                                     | Y                              | Y                                | Y                            | Y                                                                           | Y                                    | Positive       |

Key: Y = Yes; N = No; NA = Not Available; \* = Unclear

Abbreviations: GDM = Gestational Diabetes Mellitus; PA = Physical Activity

Table S3 – Characteristics of observational studies.

| DIET & PHYSICAL ACTIVITY (PA)    |                                                                                                                                                                                                            |                                                                                                      |                               |                                                                           |                                |                                                                                                                                                                                                                                   |                                                                                                                                                                                                                                                                                                                                        |                           |
|----------------------------------|------------------------------------------------------------------------------------------------------------------------------------------------------------------------------------------------------------|------------------------------------------------------------------------------------------------------|-------------------------------|---------------------------------------------------------------------------|--------------------------------|-----------------------------------------------------------------------------------------------------------------------------------------------------------------------------------------------------------------------------------|----------------------------------------------------------------------------------------------------------------------------------------------------------------------------------------------------------------------------------------------------------------------------------------------------------------------------------------|---------------------------|
| Source                           | Aim & Study population                                                                                                                                                                                     | Selection Criteria                                                                                   | Diet Assessment Method        | Physical Activity Assessment Method                                       | Diagnostic Method for GDM      | Statistical Analysis & Adjusted factors                                                                                                                                                                                           | Selected Main Findings (RR, OR etc.)                                                                                                                                                                                                                                                                                                   | Quality Rating, Retention |
| Baptiste-Robert et al. 2011 [51] | To determine pre-pregnancy PA & dietary intake in early pregnancy & its effect on glucose tolerance test.<br>n = 152<br>Age: 30.1 (SD = 5.2)<br>Country: United States<br>Study: Parity, Inflammation & DM | <b>Inclusion:</b> <14 wks gestation, no history of DM, consent to participate.                       | Validated Rapid Food Screener | Interview questionnaire (not validated)                                   | 50g, 1-hr GCT, Medical records | <b>Multiple logistic regressions</b><br><b>Adjustments:</b> race, age, parity, gestational weight gain & BMI.                                                                                                                     | 68% less likely to have a 1-hr GCT response >140 mg/dL with a leisure score of $\geq 2.75$ when compared to <2.75 [RR=0.32, 95% CI 0.12-0.86, P<0.05]. No association between dietary intake & response to 1-hr GCT response.                                                                                                          | Positive, 64.4%           |
| Zhang et al. 2014 [37]           | To examine the effect of lifestyle characteristics on risk of GDM.<br>n women = 14 437<br>n pregnancies = 20 136<br>Age: 24-44<br>Country: United States<br>Study: NHS II                                  | <b>Inclusion:</b> No history of GDM, T2DM, CVD & cancer.<br><b>Exclusion:</b> Pregnancies after GDM. | Validated FFQ.                | Validated physical activity questionnaire (not in a pregnant population). | Medical records                | <b>Multivariable log binomial models with generalized estimating equations</b><br><b>Adjustments:</b> age, parity, family history of DM, history of infertility, race/ethnicity, alcohol intake, questionnaire period & total EI. | Adhering to any 4 low risk lifestyle factors (AHEI-2010, PA, BMI, Smoking) before pregnancy, risk of GDM was lower by 83% when compared to those that did not adhere to any [RR=0.17, 95% CI 0.12-0.25]. Highest quintile of PA ( $\geq 210$ min/wk) vs lowest (<30min/wk) reduced the risk of GDM by 22% [RR=0.78, 95% CI 0.64-0.94]. | Positive, NA%             |

| Source                  | Aim & Study Population                                                                                                                                                                                 | Selection Criteria                                                                                                                                                                                        | Diet Assessment Method                          | DIET ONLY                        |                                                                                                                                                                                                                                                                                                                                                                                         |                                                                                                                                                                                                                                                   | Quality Rating, Retention |
|-------------------------|--------------------------------------------------------------------------------------------------------------------------------------------------------------------------------------------------------|-----------------------------------------------------------------------------------------------------------------------------------------------------------------------------------------------------------|-------------------------------------------------|----------------------------------|-----------------------------------------------------------------------------------------------------------------------------------------------------------------------------------------------------------------------------------------------------------------------------------------------------------------------------------------------------------------------------------------|---------------------------------------------------------------------------------------------------------------------------------------------------------------------------------------------------------------------------------------------------|---------------------------|
|                         |                                                                                                                                                                                                        |                                                                                                                                                                                                           |                                                 | Diagnostic method for GDM        | Statistical Analysis & Adjusted factors                                                                                                                                                                                                                                                                                                                                                 | Selected Main Findings (RR, OR etc.)                                                                                                                                                                                                              |                           |
| Adeney et al. 2007 [38] | To examine the relationship between coffee consumption & the risk of GDM.<br>n = 1744<br>Age: 32.1 (0.1) yrs<br>Country: United States<br>Study: Omega                                                 | <b>Inclusion:</b> <16 wks gestation, knowledge of English language.<br><b>Exclusion:</b> < 18 yrs, non-term pregnancy, did not plan to deliver at the research hospitals.                                 | 121-item semi-quantitative FFQ (not validated). | 100g, 3-hr OGTT, Medical records | <b>Generalized linear model using a log-link function</b><br><b>Adjusted factors:</b> age, race, BMI, parity, smoking, alcohol use before pregnancy, smoking during pregnancy & chronic hypertension.                                                                                                                                                                                   | Moderate pre-pregnancy caffeinated coffee intake significantly reduced the risk of GDM by 52% when compared with non-consumers [RR=0.48, 95% CI 0.28-0.82].                                                                                       | Neutral, 87.2%            |
| Bao et al. 2013 [24]    | To examine the association between dietary protein & GDM.<br>n women = 15 294<br>n pregnancies = 21 457<br>Age: 25-44 years<br>Country: United States<br>Study: NHS II                                 | <b>Inclusion:</b> singleton pregnancy, >6 months long, years 1991-2001.<br><b>Exclusion:</b> Previous GDM, T2DM, cancer, CVD prior to pregnancy, FFQ not delivered or incomplete with unrealistic values. | Semi-quantitative FFQ (validated)               | Medical records                  | <b>Multivariate logistic regression using generalized estimating equations</b><br><b>Adjustments:</b> age, parity, race/ethnicity, family history DM, smoking, alcohol intake, PA, total EI, intakes of saturated/monounsaturated/trans/polyunsaturated fatty acids, dietary cholesterol, glycemic load, dietary fiber, mutual adjustment for animal protein & vegetable protein & BMI. | Animal protein intake significantly increased GDM risk by 49% [RR=1.49, 95% CI 1.03-2.17], whereas vegetable protein intake significantly reduced the risk of GDM by 31% [RR=0.69, 95% CI 0.50-0.97].                                             | Positive, NA%             |
| Bao et al. 2014a [26]   | To examine the association between pre-pregnancy fried food consumption & risk of incident GDM.<br>n women = 15 027<br>n pregnancies = 21 079<br>Age: 25-44<br>Country: United States<br>Study: NHS II | <b>Inclusion:</b> No history of GDM, T2DM, cardiovascular disease & cancer.<br><b>Exclusion:</b> no pre-pregnancy FFQ, an incomplete form or unrealistic EI (<600 or >3500kcal/day).                      | Semi-quantitative FFQ (validated)               | Medical records                  | <b>Generalized estimating equations with log-binomials models</b><br><b>Adjustments:</b> age, parity, race/ethnicity, family history of DM, smoking, PA, total EI, diet quality (AHEI-2010 score) & BMI.                                                                                                                                                                                | Frequent fried food intake especially away from home, was associated with a greater risk of GDM when comparing frequency of $\geq 7$ /wk vs <1/wk [RR=2.18, 95% CI 1.53-3.09]. BMI adjustment resulted in attenuated but significant risk of GDM. | Positive, NA%             |

| DIET ONLY                           |                                                                                                                                                                                                             |                                                                                                                                                                                                                                                          |                                   |                                                               |                                                                                                                                                                                                                                                                  |                                                                                                                                                                                                                                                                                                                                                         |                           |
|-------------------------------------|-------------------------------------------------------------------------------------------------------------------------------------------------------------------------------------------------------------|----------------------------------------------------------------------------------------------------------------------------------------------------------------------------------------------------------------------------------------------------------|-----------------------------------|---------------------------------------------------------------|------------------------------------------------------------------------------------------------------------------------------------------------------------------------------------------------------------------------------------------------------------------|---------------------------------------------------------------------------------------------------------------------------------------------------------------------------------------------------------------------------------------------------------------------------------------------------------------------------------------------------------|---------------------------|
| Source                              | Aim & Study Population                                                                                                                                                                                      | Selection Criteria                                                                                                                                                                                                                                       | Diet Assessment Method            | Diagnostic method for GDM                                     | Statistical Analysis & Adjusted factors                                                                                                                                                                                                                          | Selected Main Findings (RR, OR etc.)                                                                                                                                                                                                                                                                                                                    | Quality Rating, Retention |
| Bao et al. 2014b [25]               | To examine the association of 3 pre-pregnancy low carbohydrate (CHO) diet patterns with risk of GDM.<br>n women = 15 265<br>n pregnancies = 21 411<br>Age: 25-44<br>Country: United States<br>Study: NHS II | <b>Inclusion:</b> No history of GDM, T2DM, CVD or cancer.<br><b>Exclusion:</b> no pre-pregnancy FFQ or an incomplete form with unrealistic EI (<600 or >3500kcal/day).                                                                                   | Semi-quantitative FFQ (validated) | Medical records                                               | <b>Log-binomials models with generalized estimating equation</b><br><b>Adjustments:</b> age, parity, race/ethnicity, family history of DM, smoking, alcohol intake, PA, BMI & total EI.                                                                          | Low CHO diet high in animal protein increases the risk of GDM by 36% [RR=1.36, 95% CI 1.13-1.64, P-trend= 0.003], however opposite is true for high vegetable protein & fat, reducing GDM by 16% [RR=0.84, 95% CI 0.69-1.03, P-trend=0.08]. Overall low CHO diet is associated with an increased risk of GDM [RR=1.27, 95% CI 1.06-1.51, P-trend=0.03]. | Positive, NA%             |
| Bao et al. 2016 [27]                | To examine the association between pre-pregnancy potato consumption & risk of GDM.<br>n = 21 693<br>Age: 24-44<br>Country: United States<br>Study: NHS II                                                   | <b>Inclusion:</b> No history of GDM, T2DM, CVD or cancer.<br><b>Exclusion:</b> no pre-pregnancy FFQ or an incomplete form with unrealistic EI (<600 or >3500kcal/day).                                                                                   | FFQ (validated)                   | Medical records                                               | <b>Log-binomials models with generalized estimating equation.</b><br><b>Adjustments:</b> age, parity, race, family history of DM, smoking, PA, EI & AHEI-2010 score.                                                                                             | Consuming ≥5 servings/wk of potatoes compared to <1 serving/wk significantly increases the risk of GDM by 62% [RR=1.62, 95% CI 1.24-2.13, P<0.001].                                                                                                                                                                                                     | Positive, NA              |
| Behboudi-Gandevani et al. 2013 [57] | To investigate the association between maternal iron/zinc serum levels & women's nutritional intake in early pregnancy with GDM.<br>n = 1 033<br>Age: 27.57 (SD = 4.84)<br>Country: Iran                    | <b>Inclusion:</b> singleton pregnancy, 20-35 yrs, 14–20 wks gestation, attending prenatal clinics in specified hospitals.<br><b>Exclusion:</b> disease of glucose metabolism (T1DM/T2DM), abortions, infections, chronic illness, or medical treatments. | Semi-quantitative FFQ (validated) | 100g, 3-hr OGTT (2004 American Diabetes Association criteria) | <b>Mann–Whitney, chi-square &amp; multiple logistic regression tests</b><br><b>Adjustments:</b> age, BMI, education, parity, passive smoking, history of GDM & family DM, serum zinc/iron & hemoglobin levels, & deficient zinc/iron intakes in early pregnancy. | Higher early pregnancy maternal serum iron levels increased risk of GDM [mean (SD) = 143.8 (48.7) versus 112.5 (83.5) µg/dL in GDM and non-GDM women respectively, P<0.0001]. No significant difference in zinc levels & iron/zinc nutritional intake between these groups [OR=1.006, 95% CI 1.002-1.009, P=0.001].                                     | Neutral, NA%              |

| DIET ONLY               |                                                                                                                                                                                            |                                                                                                                                                                                                                                                                       |                                            |                           |                                                                                                                                                                                                                                                                                |                                                                                                                                                                                                                                                                                                                                  |                           |
|-------------------------|--------------------------------------------------------------------------------------------------------------------------------------------------------------------------------------------|-----------------------------------------------------------------------------------------------------------------------------------------------------------------------------------------------------------------------------------------------------------------------|--------------------------------------------|---------------------------|--------------------------------------------------------------------------------------------------------------------------------------------------------------------------------------------------------------------------------------------------------------------------------|----------------------------------------------------------------------------------------------------------------------------------------------------------------------------------------------------------------------------------------------------------------------------------------------------------------------------------|---------------------------|
| Source                  | Aim & Study Population                                                                                                                                                                     | Selection Criteria                                                                                                                                                                                                                                                    | Diet Assessment Method                     | Diagnostic method for GDM | Statistical Analysis & Adjusted factors                                                                                                                                                                                                                                        | Selected Main Findings (RR, OR etc.)                                                                                                                                                                                                                                                                                             | Quality Rating, Retention |
| Bowers et al. 2011 [28] | To determine if pre-pregnancy dietary & supplemental iron intakes are associated with risk of GDM.<br>n = 13 475<br>Age: 22-44<br>Country: United States<br>Study: NHS II                  | <b>Inclusion:</b> 22-44 yrs, singleton pregnancy, no history of GDM/T1DM/T2DM, CVD or cancer.<br><b>Exclusion:</b> no pre-pregnancy FFQ, incomplete form, unrealistic EI (<600 or >3500kcal/day), perimenopausal at baseline, missing information on age/iron intake. | 133-item semi-quantitative FFQ (validated) | Medical records           | <b>Pooled logistic regression, restricted cubic spline regressions</b><br><b>Adjustments:</b> Age, parity, BMI, PA, glycemic index, cereal fiber, polyunsaturated fatty acids, smoking status, alcohol, total calories, & family history of DM.                                | Dietary heme iron is positively associated with GDM risk when comparing highest vs lowest quintile [RR=1.58, 95% CI 1.21-2.08]. Every 0.5mg/day increase in heme iron intake increases risk of GDM by 22% [RR=1.22, 95% CI 1.10-1.36].                                                                                           | Positive, NA%             |
| Bowers et al. 2012 [29] | To determine whether the total amount, type & source of pre-pregnancy dietary fats is related to risk of GDM.<br>n = 13 475<br>Age: 22-44<br>Country: United States<br>Study: NHS II       | <b>Inclusion:</b> age 22-44 yrs, singleton pregnancy >6 months (1991-2001).<br><b>Exclusion:</b> unrealistic total EI (<500 or 3500kcal/ day), DM, GDM, CVD, cancer, or missing information on age/iron intake or perimenopausal at baseline.                         | 133-item semi-quantitative FFQ (validated) | Medical records           | <b>Pooled logistic regression</b><br><b>Adjustments:</b> age, parity, current smoking, BMI, PA, family history of DM, smoking, alcohol, race, & total EI, cereal fiber, dietary cholesterol, glycemic load & mutual adjustment for the specific fatty acids or source of fats. | Higher animal fat & cholesterol intakes increased GDM risk by 88% [RR=1.88, 95% CI 1.36-2.60, P=0.05] and 45% [RR=1.45, 95% CI 1.11-1.89, P=0.04] respectively, when comparing highest vs lowest quintile.                                                                                                                       | Positive, NA%             |
| Chen et al. 2009 [30]   | To examine the association between regular pre-gravid sugar sweetened beverage (SSB) consumption & the risk of GDM.<br>n = 13 475<br>Age: 24-44<br>Country: United States<br>Study: NHS II | <b>Exclusion:</b> Incomplete FFQ in 1991, >70 items left blank (FFQ), unrealistic total EI, multiple gestation, no PA data in 1991, history of DM, GDM, cancer or CVD.                                                                                                | 133-item semi-quantitative FFQ (validated) | Medical records           | <b>Cox proportional hazards models &amp; multivariate adjustments</b><br><b>Adjustments:</b> age & parity.                                                                                                                                                                     | Higher SSB significantly increased the risk of GDM by 23% when comparing $\geq 5$ servings/wk vs <1/month [RR=1.23, 95% CI 1.05-1.45, P-value=0.005]. When SSB intake was treated as a continuous variable, each serving/day increment was associated with a 23% increase in GDM risk [RR=1.23, 95% CI 1.05-1.43, P-value=0.01]. | Neutral, NA%              |



| DIET ONLY                  |                                                                                                                                                                                                                                               |                                                                                                                                                                                                                                                     |                                            |                                                                |                                                                                                                                                                                                                                                                           |                                                                                                                                                                                                                                                                                                          |                           |
|----------------------------|-----------------------------------------------------------------------------------------------------------------------------------------------------------------------------------------------------------------------------------------------|-----------------------------------------------------------------------------------------------------------------------------------------------------------------------------------------------------------------------------------------------------|--------------------------------------------|----------------------------------------------------------------|---------------------------------------------------------------------------------------------------------------------------------------------------------------------------------------------------------------------------------------------------------------------------|----------------------------------------------------------------------------------------------------------------------------------------------------------------------------------------------------------------------------------------------------------------------------------------------------------|---------------------------|
| Source                     | Aim & Study Population                                                                                                                                                                                                                        | Selection Criteria                                                                                                                                                                                                                                  | Diet Assessment Method                     | Diagnostic method for GDM                                      | Statistical Analysis & Adjusted factors                                                                                                                                                                                                                                   | Selected Main Findings (RR, OR etc.)                                                                                                                                                                                                                                                                     | Quality Rating, Retention |
| Chen et al. 2012 [31]      | To examine the association of pre-pregnancy habitual consumption of fruits & fruit juices & GDM risk.<br>n = 13 475<br>Age: 22-44<br>Country: United States<br>Study: NHS II                                                                  | <b>Inclusion:</b> women that did not have DM & major chronic diseases at baseline.                                                                                                                                                                  | 133-item semi-quantitative FFQ (validated) | Medical records                                                | <b>Cox proportional hazards models &amp; restricted cubic spline regressions</b><br><b>Adjustments:</b> age, parity, race, smoking, alcohol intake, PA, family history of DM, BMI, & dietary factors (cereal fiber, processed meat/red meat, SSB & fruit juice or apple). | Higher consumption of whole fruits is not associated with an increased GDM risk, when comparing highest vs lowest quintile [RR=0.93, 95% CI 0.76-1.16]. The association of fruit juices with GDM risk appears to be nonlinear, with lowest risk reported in women with moderate fruit juice consumption. | Neutral<br>NA%            |
| Dominguez et al. 2014 [62] | To investigate the incidence of GDM according to the consumption of fast food in a cohort of university graduates.<br>n = 3 048<br>Country: Spain<br>Study: Seguimiento Universidad de Navarra (SUN)                                          | <b>Inclusion:</b> Graduates from the University of Navarra & other Spanish universities, registered nurses & other health professionals from different Spanish provinces.<br><b>Exclusion:</b> Extremely low/high total EI, had previous GDM or DM. | Semi-quantitative FFQ (validated)          | 50g or 100g OGTT (2004 American Diabetes Association criteria) | <b>Non-conditional regression models</b><br><b>Adjustments:</b> age, total EI, smoking, PA, family history of DM, cardiovascular disease/ hypertension, parity, adherence to MedDiet pattern score, alcohol intake, fiber intake, and SSB intake and BMI.                 | Fast food consumption was significantly associated with an 86% higher risk of incident GDM when compared to the lowest category of fast food consumption [OR=1.86, 95% CI 1.13-3.06].                                                                                                                    | Neutral<br>97.2%          |
| Gresham et al. 2016 [45]   | To assess whether diet quality before or during pregnancy predicts adverse pregnancy & birth outcomes in Australian women.<br>n = 1 907<br>Age: 20.8 (SD 1.4)<br>Country: Australia<br>Study: Australian Longitudinal Study on Women's Health | <b>Exclusion:</b> not classified as pre-conception or pregnant when completing the FFQ, multiple birth, incomplete FFQ.                                                                                                                             | 74-item FFQ (validated)                    | Self-report                                                    | <b>Multiple logistic regressions</b><br><b>Adjustments:</b> level of education, age, weight, area of residence, smoking status, parity, and level of exercise.                                                                                                            | When comparing highest to lowest quintile, diet quality was not associated with GDM [OR=1.7, 95% CI 0.7-4.0].                                                                                                                                                                                            | Positive,<br>NA%          |

| Source                        | Aim & Study Population                                                                                                                                                                                    | Selection Criteria                                                                                                                                                                                                                                                                            | Diet Assessment Method                     | DIET ONLY                                                                                          |                                                                                                                                                                                                                                                                                                                                                                                |                                                                                                                                                                                                                                                                                                               | Quality Rating, Retention |
|-------------------------------|-----------------------------------------------------------------------------------------------------------------------------------------------------------------------------------------------------------|-----------------------------------------------------------------------------------------------------------------------------------------------------------------------------------------------------------------------------------------------------------------------------------------------|--------------------------------------------|----------------------------------------------------------------------------------------------------|--------------------------------------------------------------------------------------------------------------------------------------------------------------------------------------------------------------------------------------------------------------------------------------------------------------------------------------------------------------------------------|---------------------------------------------------------------------------------------------------------------------------------------------------------------------------------------------------------------------------------------------------------------------------------------------------------------|---------------------------|
|                               |                                                                                                                                                                                                           |                                                                                                                                                                                                                                                                                               |                                            | Diagnostic method for GDM                                                                          | Statistical Analysis & Adjusted factors                                                                                                                                                                                                                                                                                                                                        | Selected Main Findings (RR, OR etc.)                                                                                                                                                                                                                                                                          |                           |
| Hinkle et al. 2014 [58]       | To examine the relation between first trimester coffee & tea intake & the risk of GDM.<br>n = 71 239<br>Age: 16-48 yrs<br>Country: Denmark<br>Study: Danish National Birth Cohort                         | <b>Inclusion:</b> first singleton pregnancy.<br><b>Exclusion:</b> pre-existing DM, data of relevant covariates missing.                                                                                                                                                                       | Interview                                  | Self-report & medical records                                                                      | <b>Chi-square statistics for bivariate analyses &amp; modified Poisson regression</b><br><b>Adjustments:</b> age, parity, smoking status, cola intake, BMI, SES.                                                                                                                                                                                                               | Suggested a protective, but non-significant association with increasing coffee [ $\geq 8$ vs 0 cups/day RR=0.89, 95% CI 0.64-1.25] and tea intake [ $\geq 8$ vs 0 cups/day RR=0.77, 95% CI 0.55-1.08].                                                                                                        | Neutral, 82.4%            |
| Karamanos et al. 2014 [63]    | To investigate the association of MedDiet with the incidence of GDM in Mediterranean regions.<br>n = 1 003<br>Country: Algeria, France, Greece, Italy, Lebanon, Malta, Morocco, Serbia, Syria & Tunisia). | <b>Inclusion:</b> women with oral glucose tolerance test results, women with/without a history of GDM.<br><b>Exclusion:</b> history of T1DM or T2DM.                                                                                                                                          | Questionnaire (validated) & MedDiet Index. | 75g, 1 & 2-hr OGTT (2010 International Association in Diabetes and Pregnancy Study Group criteria) | <b>Binary logistic regression</b><br><b>Adjustments:</b> age, BMI, family history of DM, gestational weight gain, EI.                                                                                                                                                                                                                                                          | GDM incidence was lower in subjects with better MedDiet adherence, 8.0% vs 12.3% [OR=0.62, 95% CI 0.40-0.95, P=0.030] by American Diabetic Association 2010 and 24.3% vs 32.8% [OR=0.66, 95% CI=0.50-0.87, P=0.004] according to International Association of Diabetes & Pregnancy Study Group 2012 criteria. | Positive 93.2%            |
| Osorio-Yáñez et al. 2016 [41] | To examine the association between dietary Calcium intake and risk of GDM.<br>n = 3 414<br>Age: 32.8<br>Country: United States<br>Study: Omega                                                            | <b>Inclusion:</b> >18 yrs, <20 wks gestation, spoke & read English, delivered at specified hospitals.<br><b>Exclusion:</b> history of DM/GDM, multi-gestation, pregnancy <20 wks, iron deficiency anaemia, incomplete FFQ, unrealistic levels of total EI (<500 kcal/day or >3500 kcal/ day). | 121-item FFQ (validated)                   | 100g, 3-hr OGTT (2004 American Diabetic Association criteria)                                      | <b>Generalized linear models with log-link function, log Poisson regression model and robust standard errors.</b><br><b>Adjustments:</b> total energy, age, race/ethnicity, education, smoking status, BMI, prenatal vitamin use, PA, family history of DM, alcohol, coffee, SSB, red & processed meats, fatty fish, total fiber intake & dietary covariates (vitamin D & Mg). | Higher dietary Calcium intake compared to lower was inversely (though not statistically) associated with GDM risk [RR=0.57, 95% CI=0.27-1.21]. Calcium intake $\geq 795$ mg/day resulted in a 42% reduction in GDM risk when (<795 mg/day) [R=0.58, 95% CI 0.38-0.90, P-value= 0.02).                         | Positive, 74.2%           |

| DIET ONLY                |                                                                                                                                                                                                       |                                                                                                                                                                                                                                |                                                     |                                                               |                                                                                                                                                                                                                                               |                                                                                                                                                                                                                                                                                                                                 |                           |
|--------------------------|-------------------------------------------------------------------------------------------------------------------------------------------------------------------------------------------------------|--------------------------------------------------------------------------------------------------------------------------------------------------------------------------------------------------------------------------------|-----------------------------------------------------|---------------------------------------------------------------|-----------------------------------------------------------------------------------------------------------------------------------------------------------------------------------------------------------------------------------------------|---------------------------------------------------------------------------------------------------------------------------------------------------------------------------------------------------------------------------------------------------------------------------------------------------------------------------------|---------------------------|
| Source                   | Aim & Study Population                                                                                                                                                                                | Selection Criteria                                                                                                                                                                                                             | Diet Assessment Method                              | Diagnostic method for GDM                                     | Statistical Analysis & Adjusted factors                                                                                                                                                                                                       | Selected Main Findings (RR, OR etc.)                                                                                                                                                                                                                                                                                            | Quality Rating, Retention |
| Qiu et al. 2011a [42]    | To investigate the association of egg intake and dietary cholesterol & GDM risk in a cohort study.<br>n = 3 158<br>Age (mean): 32.7 yrs<br>Country: United States<br>Study: Omega                     | <b>Inclusion:</b> pre-natal care <20 wks, >18 yrs, spoke/read English, to deliver at either of 2 study hospitals.<br><b>Exclusion:</b> DM, multi-gestation, incomplete or unrealistic dietary intake (<500 or >3500kcal/day).  | 121-item semi-quantitative FFQ (validated)          | 100g, 3-hr OGTT (2004 American Diabetic Association criteria) | <b>Multivariable models, generalized linear models using a log-link function</b><br><b>Adjustments:</b> EI, age, race/ethnicity, parity, PA, pre-pregnancy BMI, dietary fiber, vitamin C, intake red & processed meats, saturated fat intake. | Higher eggs and cholesterol intake during the pre-pregnancy and early pregnancy period were associated with a greater GDM risk [RR (≥10 eggs/week) = 2.52, 95% CI 1.11-5.72; RR (294 vs <151 mg/day cholesterol) = 2.35, 95% CI 1.35-4.09 respectively].                                                                        | Positive, 79%             |
| Qiu et al. 2011b [43]    | To examine the associations of dietary heme & non-heme iron with the risk of GDM.<br>n = 3 158<br>Age: 32.7 yrs<br>Country: United States<br>Study: Omega                                             | <b>Inclusion:</b> pre-natal care <20 wks, >18 yrs, spoke/read English, to deliver at either of 2 selected hospitals.<br><b>Exclusion:</b> DM, multi-gestation, incomplete or excessive dietary intake (<500 or >3500kcal/day). | 121-item semi-quantitative FFQ (validated)          | 100g, 3-hr OGTT (2004 American Diabetic Association criteria) | <b>Generalized linear models using a log-link function</b><br><b>Adjustments:</b> EI, age, race/ethnicity, parity, PA, pre-pregnancy BMI, dietary fiber, vitamin C.                                                                           | Higher heme iron intake is associated with an increased GDM risk [RR=1.57, 95% CI 0.95–2.61] when comparing highest to quartile. Women who reported very high heme iron intake (≥1.52 mg/ day) had a 2.26-fold increased risk (95% CI 1.09–4.69) of GDM compared with women reporting lower levels.                             | Positive, 79%             |
| Radesky et al. 2008 [48] | To report results from an analysis of diet quality & risk of abnormal glucose tolerance among a cohort of women.<br>n = 1 733<br>Age: 32.2 (4.9) yrs<br>Country: United States<br>Study: Project Viva | <b>Inclusion:</b> <20 wks, singleton pregnancy, complete study forms in English.<br><b>Exclusion:</b> missing or incomplete oral glucose tolerance test & diet, history of T2DM or T2DM, or polycystic ovarian syndrome.       | Self-administered Semi-quantitative FFQ (validated) | 100g, 3-hr OGTT (2004 American Diabetes Association criteria) | <b>Multinomial regression</b><br><b>Adjustments:</b> age, pre-pregnancy BMI, race/ethnicity, family history of DM, history of GDM.                                                                                                            | Alpha-linolenic acid was associated with increased risk for GDM [OR=1.29, 95% CI 1.04-1.60] for each 300 mg/day after adjustment for confounders & other fats. Overall women with GDM had higher average n-3 fatty acid intake, lower n-6/n-3 ratio, and slightly higher polyunsaturated fat intake than normo-glycaemic women. | Neutral, 81.4%            |

| DIET ONLY                    |                                                                                                                                                                                                                          |                                                                                                                                                                                                                                                                            |                           |                                                                                           |                                                                                                                                                                                                                                  |                                                                                                                                                                                                                                                                                                                                                                                                                                                  |                           |
|------------------------------|--------------------------------------------------------------------------------------------------------------------------------------------------------------------------------------------------------------------------|----------------------------------------------------------------------------------------------------------------------------------------------------------------------------------------------------------------------------------------------------------------------------|---------------------------|-------------------------------------------------------------------------------------------|----------------------------------------------------------------------------------------------------------------------------------------------------------------------------------------------------------------------------------|--------------------------------------------------------------------------------------------------------------------------------------------------------------------------------------------------------------------------------------------------------------------------------------------------------------------------------------------------------------------------------------------------------------------------------------------------|---------------------------|
| Source                       | Aim & Study Population                                                                                                                                                                                                   | Selection Criteria                                                                                                                                                                                                                                                         | Diet Assessment Method    | Diagnostic method for GDM                                                                 | Statistical Analysis & Adjusted factors                                                                                                                                                                                          | Selected Main Findings (RR, OR etc.)                                                                                                                                                                                                                                                                                                                                                                                                             | Quality Rating, Retention |
| Schoenacker et al. 2015 [47] | To examine the associations between pre-pregnancy dietary patterns & risk of GDM. n = 3 853<br>n pregnancies = 6626<br>Age: 28 (1.4) yrs<br>Country: Australia<br>Study: Australian Longitudinal Study on Women's Health | <b>Inclusion:</b> Australian women without pre-existing DM.<br><b>Exclusion:</b> T2DM or T2DM, pregnant with their first child in 2003, did not report a live birth at consecutive surveys in 2006/2009/2012, missing data, had GDM, unrealistic EI (<2093 or >14654kJ/d). | Questionnaire (validated) | 75g, 1-hr OGTT;<br>Self-report (1998 Australasian Diabetes in Pregnancy Society criteria) | <b>Generalized estimating equation, Log-binomial models or Log-Poisson</b><br><b>Adjustments:</b> age, EI, parity, hypertensive disorders of pregnancy, highest education, smoking status, PA, BMI, polycystic ovarian syndrome. | No association between fruit & low-fat dairy or cooked vegetables with GDM risk. Mediterranean-style diet associated with 15% lower GDM risk [RR= 0.85, 95% CI 0.76-0.98]. Each SD increase in score of the meats, snacks & sweets pattern was associated with 41% higher GDM risk [RR= 0.59, 95% CI 1.03-1.91]. This association was no longer statistically significant after additional adjustment including BMI [RR=1.35, 95% CI 0.98-1.81]. | Positive, 42.4%           |
| Schoenacker et al. 2016 [46] | To determine how much pre-pregnancy BMI mediates the association between a pre-pregnancy MedDiet & development of GDM. n = 3 378<br>Country: Australia<br>Study: Australian Longitudinal Study on Women's Health         | <b>Inclusion:</b> not pregnant at baseline and who reported ≥1 live birth during the 9-y follow-up.<br><b>Exclusion:</b> women in rural or remote areas.                                                                                                                   | FFQ (validated)           | Self-report (1998 Australasian Diabetes in Pregnancy Society criteria)                    | <b>Linear or logistic regression</b><br><b>Adjustments:</b> education, parity, polycystic ovarian syndrome, EI and PA.                                                                                                           | BMI contributes 32% to the total effects and relationship between pre-pregnancy MedDiet and odds of GDM [OR=1.35, 95% CI 1.02-1.60].                                                                                                                                                                                                                                                                                                             | Positive, 84.5%           |

| DIET ONLY               |                                                                                                                                                                                                                 |                                                                                                                                                                                                                                               |                                            |                           |                                                                                                                                                                                                                                                                                     |                                                                                                                                                                                                                                                                                                                                                             |                           |
|-------------------------|-----------------------------------------------------------------------------------------------------------------------------------------------------------------------------------------------------------------|-----------------------------------------------------------------------------------------------------------------------------------------------------------------------------------------------------------------------------------------------|--------------------------------------------|---------------------------|-------------------------------------------------------------------------------------------------------------------------------------------------------------------------------------------------------------------------------------------------------------------------------------|-------------------------------------------------------------------------------------------------------------------------------------------------------------------------------------------------------------------------------------------------------------------------------------------------------------------------------------------------------------|---------------------------|
| Source                  | Aim & Study Population                                                                                                                                                                                          | Selection Criteria                                                                                                                                                                                                                            | Diet Assessment Method                     | Diagnostic method for GDM | Statistical Analysis & Adjusted factors                                                                                                                                                                                                                                             | Selected Main Findings (RR, OR etc.)                                                                                                                                                                                                                                                                                                                        | Quality Rating, Retention |
| Tobias et al. 2012 [33] | To assess usual pre-pregnancy adherence to well-known dietary patterns & GDM risk. n = 15 254<br>Age: 24-44<br>Country: United States<br>Study: NHS II                                                          | <b>Inclusion:</b> singleton pregnancy, no GDM history, no history of DM/cancer/ CVD event.<br><b>Exclusion:</b> pregnancies after GDM, pre-pregnancy FFQ, left >70 FFQ items blank, or reported unrealistic total EI (<500 or 3500kcal/ day). | Semi-quantitative FFQ (validated)          | Medical records           | <b>Multi-variable marginal logistic using Generalized estimating equation</b><br><b>Adjustments:</b> age, EI, race/ethnicity, PA, BMI, family history of DM, gravidity, smoking status.                                                                                             | Comparing high to low dietary adherence, the risk of GDM was 24% lower with the alternate MedDiet score [RR=0.76, 95% CI 0.60, 0.95, P-value = 0.004], 34% lower with the Dietary Approaches to Stop Hypertension (DASH) score [RR=0.66, 95% CI 0.53, 0.82, P-trend=0.0005], & 46% lower with the AHEI score [RR=0.54, 95% CI 0.43, 0.68, P-trend=<0.0001]. | Positive, NA%             |
| Zhang et al. 2006a [34] | To examine whether pre-gravid dietary fiber consumption from cereal, fruit, & vegetable sources & dietary glycemic load was related to GDM. n = 13 110<br>Age: 24-44<br>Country: United States<br>Study: NHS II | <b>Inclusion:</b> pregnant women.<br><b>Exclusion:</b> did not complete FFQ in 1991, incomplete FFQ, dietary intake was unrealistic total EI (500 kcal/day or 3,500 kcal/day), multiple gestation or history DM/cancer/CVD or GDM.            | 133-item Semi-quantitative FFQ (validated) | Medical records           | <b>Cox proportional hazards analysis</b><br><b>Adjustments:</b> parity, age, BMI, smoking status, race/ ethnicity, PA, family history of DM & dietary variables (total fat expressed as % energy), cereal fiber, fruit & vegetable fiber, alcohol consumption, EI & glycaemic load. | Dietary total fiber & cereal & fruit fiber were strongly inversely associated with GDM risk. Each 10g/day increment in total fiber intake was associated with 26% (RR=0.74, 95% CI 0.51-0.91) reduction in risk. Each 5g/day increment in cereal or fruit fiber was associated with a 23% (9–36) or 26% (5– 42) reduction respectively.                     | Positive, NA%             |
| Zhang et al. 2006b [35] | To examine whether dietary patterns are related to risk of GDM. n = 13 110<br>Age: 24-44<br>Country: United States<br>Study: NHS II                                                                             | <b>Inclusion:</b> pregnant women<br><b>Exclusion:</b> did not complete FFQ in 1991, > 9 items blank in FFQ, unrealistic total EI (500 kcal/day or 3,500 kcal/day), multiple gestation or history of DM/cancer/CVD or GDM.                     | 133-item semi-quantitative FFQ (validated) | Medical records           | <b>Cox proportional hazards analysis</b><br><b>Adjustments:</b> parity, age, BMI, smoking status, race/ ethnicity, PA, family history of diabetes & dietary variables including total fat (% energy), cereal fiber, alcohol intake, total EI & glycaemic load.                      | Comparing the <i>highest</i> with the <i>lowest</i> quintile of the Western pattern scores, RR=1.63 (95% CI 1.20–2.21, P=0.001) & conversely comparing the lowest with the highest quintile of the prudent pattern scores, RR=1.39 (95% CI 1.08–1.80, P=0.018).                                                                                             | Positive, NA%             |

| PHYSICAL ACTIVITY ONLY        |                                                                                                                                                                                                          |                                                                                                                                                                                                                                                                                       |                                                                                    |                                                                                |                                                                                                                                                                                                                                                           |                                                                                                                                                                                                                                                                                                                  |                           |
|-------------------------------|----------------------------------------------------------------------------------------------------------------------------------------------------------------------------------------------------------|---------------------------------------------------------------------------------------------------------------------------------------------------------------------------------------------------------------------------------------------------------------------------------------|------------------------------------------------------------------------------------|--------------------------------------------------------------------------------|-----------------------------------------------------------------------------------------------------------------------------------------------------------------------------------------------------------------------------------------------------------|------------------------------------------------------------------------------------------------------------------------------------------------------------------------------------------------------------------------------------------------------------------------------------------------------------------|---------------------------|
| Source                        | Aim & Study Population                                                                                                                                                                                   | Selection Criteria                                                                                                                                                                                                                                                                    | Physical Activity Assessment Method                                                | Diagnostic method for GDM                                                      | Statistical Analysis & Adjusted factors                                                                                                                                                                                                                   | Selected Main Findings (RR, OR etc.)                                                                                                                                                                                                                                                                             | Quality Rating, Retention |
| Badon et al. 2016 [39]        | To investigate the associations of Leisure Time Physical Activity (PA) before and during pregnancy with GDM risk. n = 3 449<br>Age: 32.6 (SD 4.4)<br>Country: United States<br>Study: Omega              | <b>Inclusion:</b> >18 yrs, speak & read in English language, prenatal care <20 wks gestation, deliver at allocated hospitals.<br><b>Exclusion:</b> Pre-pregnancy or early pregnancy PA of $\geq 35$ metabolic equivalents (MET-hrs/week), missing data on PA, had prior T1/T2DM.      | Questionnaire (Invalidated)                                                        | 100-g, 3-hr OGTT (1997 American Diabetic Association criteria)                 | <b>Multivariable Poisson regression</b><br><b>Adjustments:</b> age, race, education, marital status, nulliparity, pre-pregnancy BMI category, gestational weight gain, smoking during pregnancy, alcohol use during pregnancy & year of study enrollment. | Leisure time PA during both pre-pregnancy and early pregnancy was associated with a 46% reduced risk of GDM [RR=0.54, 95% CI 0.32-0.89] when compared with inactivity.                                                                                                                                           | Neutral, NA               |
| Chasan-Taber et al. 2008 [56] | To determine whether PA during pregnancy reduces the risk of GDM in Hispanic women. n = 1006, (710 for mid-pregnancy data)<br>Age: 16-40 yrs<br>Country: United States                                   | <b>Inclusion:</b> age 16-40 yrs, <24 wks gestation.<br><b>Exclusion:</b> Non-Hispanic, T2DM, hypertension, heart disease, chronic renal disease, medications that influence glucose tolerance, multi-gestation & previous participation in the study.                                 | Kaiser PA Survey & Pregnancy PA Questionnaire (validated in a pregnant population) | 100g, 3 hr OGTT (2004 American Diabetic Association criteria), medical records | <b>Logistic regression</b><br><b>Adjustments:</b> age & BMI.                                                                                                                                                                                              | Higher levels of household/caregiving activity in early (OR=0.2, 95% CI 0.1-0.8, P-trend=0.03) & mid-pregnancy (OR=0.2, 95% CI 0.1-0.8, P-trend=0.004) were associated with a reduced risk of GDM. Higher level of total PA was also associated with reduced odds of GDM (OR=0.4, 95% CI 0.1-1.2, P-trend=0.06). | Positive, 81.7%           |
| Chasan-Taber et al. 2014 [55] | To examine the relationship between PA during pre, early & mid pregnancy & risk of abnormal glucose tolerance & GDM. n = 1241<br>Age: 16-40 yrs<br>Country: United States<br>Study: Proyecto Buena Salud | <b>Inclusion:</b> born in the Caribbean Islands or had a parent or $\geq 2$ grand-parents born in the Caribbean Islands.<br><b>Exclusion:</b> history of DM/hypertension/heart or renal disease, <16 or >40 yrs old, multi-gestation or medications that influence glucose tolerance. | Pregnancy PA Questionnaire (validated in pregnant women)                           | 100g, 3-hr OGTT (2004 American Diabetic Association criteria); medical records | <b>Logistic regression</b><br><b>Adjustments:</b> age, BMI, gestational weight gain, education level, generation in the United States.                                                                                                                    | Women in the top quartile of moderate intensity PA in early pregnancy had a 52% decreased risk of abnormal glucose result when compared to the lowest quartile [OR=0.48, 95% CI 0.27-0.88, P-trend=0.03]                                                                                                         | Positive, 76.3%           |

| PHYSICAL ACTIVITY ONLY   |                                                                                                                                                                                                       |                                                                                                                                                                                                                                                                                                        |                                                |                                                                                 |                                                                                                                                                              |                                                                                                                                                                                                                                                                                           |                           |
|--------------------------|-------------------------------------------------------------------------------------------------------------------------------------------------------------------------------------------------------|--------------------------------------------------------------------------------------------------------------------------------------------------------------------------------------------------------------------------------------------------------------------------------------------------------|------------------------------------------------|---------------------------------------------------------------------------------|--------------------------------------------------------------------------------------------------------------------------------------------------------------|-------------------------------------------------------------------------------------------------------------------------------------------------------------------------------------------------------------------------------------------------------------------------------------------|---------------------------|
| Source                   | Aim & Study Population                                                                                                                                                                                | Selection Criteria                                                                                                                                                                                                                                                                                     | Physical Activity Assessment Method            | Diagnostic method for GDM                                                       | Statistical Analysis & Adjusted factors                                                                                                                      | Selected Main Findings (RR, OR etc.)                                                                                                                                                                                                                                                      | Quality Rating, Retention |
| Currie et al. 2014 [59]  | To examine if physical activity in the year pre- pregnancy & in the first half of pregnancy is associated with maternal & neonatal outcomes.<br>n = 1 749<br>Age: 31 (mean)<br>Country: Canada        | <b>Exclusion:</b> >20 wks gestation, pre-existing DM, early pregnancy loss or pregnancy termination, any missing information, contraindications to PA present before 20 wks gestation.                                                                                                                 | Kaiser PA Survey (validated in pregnant women) | 50g, 1-hr GCT or 100g 1 & 2-hr OGTT, Medical records                            | <b>Logistic regression</b><br><b>Adjustments:</b> age, pre-pregnancy BMI, education, parity, & history of GDM.                                               | Relative to the lowest tertile of pre-pregnancy household PA, women in the middle & the highest tertiles were at decreased risk of GDM [OR=0.29, 95% CI 0.12 – 0.74 & OR=0.33, 95% CI 0.12 - 0.88] respectively, albeit statistically insignificant.                                      | Positive, 79.5%           |
| Dempsey et al. 2004 [40] | To examine the relationship between recreational PA before & during pregnancy & risk of GDM.<br>n = 909<br>Country: United States<br>Study: Omega                                                     | <b>Inclusion:</b> <16 wks gestation<br><b>Exclusion:</b> <18 yrs, did not speak/read English, did not carry to term, if they did not plan to deliver at the selected hospitals.                                                                                                                        | Questionnaire (Invalidated)                    | 100-g, 3-hr OGTT (1997 American Diabetes Association criteria), Medical records | <b>Generalized linear models using a log-link function</b><br><b>Adjustments:</b> maternal age, race, parity, & pre-pregnancy BMI.                           | Compared with those who were inactive, women who participated in any recreational PA in the pre-pregnancy period, had a 56 % GDM risk reduction (RR=0.44, 95% CI 0.21 - 0.91). Women who engaged in PA before & during pregnancy had a 69% GDM reduced risk (RR=0.31, 95% CI 0.12, 0.79). | Positive, 90.9%           |
| Dye et al. 1997 [52]     | To determine whether exercise has a preventive role in the development of GDM in women living in central New York State on a population-based birth registry.<br>n = 12 799<br>Country: United States | <b>Inclusion:</b> women that delivered a livebirth within the New York State between 1/10/1995-31/07/1996.<br><b>Exclusion:</b> conditions that affect exercise (e.g. heart disease, multi-gestation, incompetent cervix, previous preterm delivery & low birth weight infant & chronic hypertension). | Personal interview                             | Medical records                                                                 | <b>Chi-square statistics, Logistic regression</b><br><b>Adjustments:</b> age, race, parity, pre-pregnancy BMI, gestational weight gain & insurance coverage. | When stratified by pre-pregnancy BMI category, exercise was associated with reduced rates of GDM only among women with a BMI >33 [OR=1.9, 95% CI 1.2-3.1].                                                                                                                                | Positive, 89.1%           |

## PHYSICAL ACTIVITY ONLY

| Source                   | Aim & Study Population                                                                                                                                                                               | Selection Criteria                                                                                                                                                                                                                                                                               | Physical Activity Assessment Method                                                                                            | Diagnostic method for GDM                                                                            | Statistical Analysis & Adjusted factors                                                                                                                   | Selected Main Findings (RR, OR etc.)                                                                                                                                                                                                                                                                                      | Quality Rating, Retention |
|--------------------------|------------------------------------------------------------------------------------------------------------------------------------------------------------------------------------------------------|--------------------------------------------------------------------------------------------------------------------------------------------------------------------------------------------------------------------------------------------------------------------------------------------------|--------------------------------------------------------------------------------------------------------------------------------|------------------------------------------------------------------------------------------------------|-----------------------------------------------------------------------------------------------------------------------------------------------------------|---------------------------------------------------------------------------------------------------------------------------------------------------------------------------------------------------------------------------------------------------------------------------------------------------------------------------|---------------------------|
| Iqbal et al. 2007 [60]   | To identify lifestyle predictors of GDM in South Asian women. n = 611<br>Age: 29.4 (4.7)<br>Country: Canada                                                                                          | <b>Inclusion:</b> women of South Asian origin, ≤18 wks of gestation & did not have known diabetes.<br><b>Exclusion:</b> missing data, terminating a pregnancy, refusing oral glucose tolerance test.                                                                                             | Interviewer administered Monitoring Trends & Determinants of Cardiovascular Disease (Monica) Optional Study of PA, (Validated) | 100g, 3-hr OGTT (2004 American Diabetic Association criteria)                                        | <b>Logistic regression</b><br><b>Adjustments:</b> age, family history of DM, education, height, parity BMI, PA level (kcal/day) & rate of weight gain/wk. | Increase in PA (100 kcal), decreased the risk of GDM by 11% [OR=0.89, 95% CI 0.79-0.99].                                                                                                                                                                                                                                  | Positive, 81.6%           |
| Morkrid et al. 2007 [61] | To assess the association between objectively recorded PA in early gestation & GDM identified at multiethnic cohort. n = 759<br>Age: 29.9 (4.4)<br>Country: Norway<br>Study: Stork Groruddalen Study | <b>Inclusion:</b> lived in one of the selected districts, to give birth in one of the 2 selected hospitals, <20 wks gestation, could speak one of the 9 listed languages & to provide written consent.<br><b>Exclusion:</b> known diabetes or other diseases requiring frequent hospital visits. | Questionnaire (validated)                                                                                                      | 75g, 2-hr OGTT (amended 2010 International Association of Diabetes & Pregnancy Study Group criteria) | <b>Logistic regression</b><br><b>Adjustments:</b> ethnic origin, wks gestation, age, parity, & pre-pregnancy BMI.                                         | Significant associations between the following 3 components GDM risk: objectively recorded steps/day in early gestation [OR=0.79, 95% CI 0.65–0.97], self-reported regular PA before pregnancy [OR=0.66, 95% CI 0.46-0.94] & self-reported aerobic PA ≥ 150 min/wk 3 months before pregnancy [OR=0.69, 95% CI 0.49-0.97]. | Positive, 92.2%           |



## PHYSICAL ACTIVITY ONLY

| Source                  | Aim & Study Population                                                                                                                                                                                          | Selection Criteria                                                                                                                                                                                                                                                                          | Physical Activity Assessment Method                                                                                                  | Diagnostic method for GDM                                     | Statistical Analysis & Adjusted factors                                                                                                           | Selected Main Findings (RR, OR etc.)                                                                                                                                                                                                                                        | Quality Rating, Retention |
|-------------------------|-----------------------------------------------------------------------------------------------------------------------------------------------------------------------------------------------------------------|---------------------------------------------------------------------------------------------------------------------------------------------------------------------------------------------------------------------------------------------------------------------------------------------|--------------------------------------------------------------------------------------------------------------------------------------|---------------------------------------------------------------|---------------------------------------------------------------------------------------------------------------------------------------------------|-----------------------------------------------------------------------------------------------------------------------------------------------------------------------------------------------------------------------------------------------------------------------------|---------------------------|
| Oken et al. 2006 [49]   | To examine the associations of PA & television viewing before & during pregnancy, with risk for GDM & abnormal glucose tolerance. n = 1 805<br>Age: 32.1 (5.0)<br>Country: United States<br>Study: Project Viva | <b>Exclusion:</b> history of T1DM or type 2 diabetes no measurement of blood glucose levels during pregnancy, no data on PA or TV viewing, no records of pre-pregnancy BMI.                                                                                                                 | Questionnaire; modified from the leisure time activity section of the PA Scale for the Elderly (validated on an elderly population). | 100g, 3-hr OGTT (2004 American Diabetic Association criteria) | <b>Logistic regression Adjustments:</b> age, race/ethnicity, pre-pregnancy BMI, history of GDM in a previous pregnancy, & mother's history of DM. | Vigorous activity during the year before pregnancy reduced the risk of GDM by 44% [OR=0.56, 95% CI 0.33-0.95]. Vigorous activity before pregnancy & light-to-moderate or vigorous activity during pregnancy appeared to reduce the risk of GDM [OR=0.49, 95% CI 0.24-1.01]. | Positive, 84.8%           |
| Putnam et al. 2013 [53] | To determine association between daily physical activity & pregnancy & neonatal outcomes in stay at home military wives. n = 190<br>Age: 28.3 (5.5)<br>Country: United States                                   | <b>Inclusion:</b> unemployed, married to an active-duty or reserve service member, aims to complete prenatal care & delivery within the specified medical facility.<br><b>Exclusion:</b> preexisting hypertension/ DM or thrombophilia, multiple gestation, or history of preterm delivery. | Validated questionnaire describing their domestic PA on a typical day during the previous 4 weeks (1 <sup>st</sup> trimester).       | 100g, 3-hr OGTT, no further information                       | <b>Logistic regression Adjustments:</b> maternal BMI at first visit & delivery, number of children at home, gravidity, & parity.                  | Highest incidence rate of GDM occurred in the group with the least average daily energy expenditure (P=0.025).                                                                                                                                                              | Positive, NA%             |

## PHYSICAL ACTIVITY ONLY

| Source                   | Aim & Study Population                                                                                                                                                       | Selection Criteria                                                                                                                                                                                                                                   | Physical Activity Assessment Method                                                                                                                     | Diagnostic method for GDM | Statistical Analysis & Adjusted factors                                                                                                    | Selected Main Findings (RR, OR etc.)                                                                                                                                                                                                                                                                                                                          | Quality Rating, Retention |
|--------------------------|------------------------------------------------------------------------------------------------------------------------------------------------------------------------------|------------------------------------------------------------------------------------------------------------------------------------------------------------------------------------------------------------------------------------------------------|---------------------------------------------------------------------------------------------------------------------------------------------------------|---------------------------|--------------------------------------------------------------------------------------------------------------------------------------------|---------------------------------------------------------------------------------------------------------------------------------------------------------------------------------------------------------------------------------------------------------------------------------------------------------------------------------------------------------------|---------------------------|
| Rudra et al. 2006 [44]   | To examine the relation between perceived exertion & GDM within sub-groups of women categorized by energy expenditure.<br>n = 897<br>Country: United States<br>Study: Omega  | <b>Inclusion:</b> women who initiated prenatal care before 16 wks gestation.<br><b>Exclusion:</b> <18 yrs, did not speak/read English, did not plan to carry the pregnancy to term, or did not plan to deliver at either of the specified hospitals. | Stanford 7-Day PA Recall & the Minnesot Leisure-Time PA Questionnaire, (validated among men & non-pregnant women).                                      | Medical records           | <b>Logistic regression models</b><br><b>Adjustments:</b> age, race/ethnicity pre-pregnancy hypertension, nulliparity, & pre-pregnancy BMI. | Women reporting strenuous & very strenuous maximal exertion had 37% [OR=0.63, 95% CI 0.31-1.29] & 43% [OR=0.57, 95% CI 0.24-1.37] lower risk of GDM respectively, when compared with negligible-moderate exertion. Women reporting $\geq 15.0$ MET-hours/week experienced 86% GDM risk reduction when compared to inactive women [OR=0.14, 95% CI 0.05-0.38]. | Neutral, 89.7%            |
| Solomon et al. 1997 [32] | To assess whether recognized determinants of NIDDM may also be markers for increased risk of GDM.<br>n = 14 613<br>Age: 25-42 yrs<br>Country: United States<br>Study: NHS II | <b>Inclusion:</b> no history of GDM or diabetes, singleton pregnancy between 1990 & 1994, pregnancy lasting >6 months.<br><b>Exclusion:</b> multiple pregnancy.                                                                                      | PA (1989) - assessed as average MET expenditures. In 1991 - women were questioned about the number of times /wk they engaged in PA to perspire heavily. | Medical records           | <b>Logistic regression</b><br><b>Adjustments:</b> age, BMI & parity.                                                                       | No association between total MET score in 1989 & subsequent GDM risk. GDM risk appeared slightly lower with frequent participation in vigorous PA, albeit statistically insignificant [RR( $\geq 4$ /week) = 0.78, 95% CI 0.47-1.29].                                                                                                                         | Neutral, NA%              |

## PHYSICAL ACTIVITY ONLY

| Source                         | Aim & Study Population                                                                                                                                                                              | Selection Criteria                                                                                                                                                                                                               | Physical Activity Assessment Method                                                                                               | Diagnostic method for GDM                                                                  | Statistical Analysis & Adjusted factors                                                                                                                                                                                                             | Selected Main Findings (RR, OR etc.)                                                                                                                                                                                                                                                           | Quality Rating, Retention          |
|--------------------------------|-----------------------------------------------------------------------------------------------------------------------------------------------------------------------------------------------------|----------------------------------------------------------------------------------------------------------------------------------------------------------------------------------------------------------------------------------|-----------------------------------------------------------------------------------------------------------------------------------|--------------------------------------------------------------------------------------------|-----------------------------------------------------------------------------------------------------------------------------------------------------------------------------------------------------------------------------------------------------|------------------------------------------------------------------------------------------------------------------------------------------------------------------------------------------------------------------------------------------------------------------------------------------------|------------------------------------|
| Van der Ploeg et al. 2011 [48] | To examine the relationships between PA, sedentary behavior & the development of GDM<br>n = 3 529<br>Age: 24-34 yrs<br>Country: Australia<br>Study: Australian Longitudinal Study on Women's Health | <b>Inclusion:</b> Women in Australia.<br><b>Exclusion:</b> T1DM, type 2 diabetes were pregnant at the second survey, were pregnant with their first child at the third survey or did not have a live-birth between survey 2 & 3. | Australian Longitudinal Study on Women's Health modification of the 7-day recall Active Australia questionnaire.<br>Non-validated | 75 g, 2-hr OGTT, self-reported (1998 Australasian Diabetes in Pregnancy Society criteria). | <b>Generalized estimating equations</b><br><b>Adjustments:</b> EI, overweight & obesity, age, BMI, parity, age at birth of first child, country of birth, & education.                                                                              | Neither total PA nor sedentary behavior were associated with the risk of GDM. Analyses for self-reported vigorous PA showed no significant relationships with the development of GDM, with OR=1.23 [95% CI 0.83-1.81] & OR=0.95 [95% CI 0.62-1.46] for 1–90 min/wk & >90 min/wk, respectively. | Neutral,<br>S2: 82.0%<br>S3: 75.3% |
| Zhang et al. 2006c [36]        | To assess whether the amount, type, & intensity of pre-gravid PA & sedentary behaviors are associated with GDM risk.<br>n = 21 765<br>Age: 24-44 yrs<br>Country: United States<br>Study: NHS II     | <b>Inclusion:</b> singleton pregnancy lasting 6 months or longer.<br><b>Exclusion:</b> history of GDM/diabetes/cancer or cardiovascular disease, were pregnant in 1989 questionnaire, no PA data, multiple gestation.            | Questionnaire (validated)                                                                                                         | Medical records                                                                            | <b>Cox proportional hazards analysis</b><br><b>Adjustments:</b> parity, nulliparous women, age, smoking status, race or ethnicity, family history of diabetes & dietary variables (total fat, % energy, cereal fiber, alcohol, GI, total EI) & BMI. | Highest quintile of vigorous PA significantly reduced the risk of GDM by 23%, when compared to the lowest quintile [RR=0.77, 95% CI 0.69-0.94, P-trend=0.002].                                                                                                                                 | Positive<br>69.8%                  |

**Abbreviations:** AHEI-2010 – Alternative Healthy Eating Index – 2010, BMI – Body mass index, CHO – Carbohydrates, CIs – confidence intervals, CVD – Cardiovascular Disease, DM – Diabetes Mellitus, EI – Energy Intake, FFQ – food frequency questionnaire, GCT – Glucose Challenge Test, GDM – gestational diabetes mellitus, GI – Glycemic index MedDiet – Mediterranean Diet, MET - metabolic equivalent, NA – Not Available, NHS I/II – Nurse's Health Study I or II, NIDDM – non-insulin dependent diabetes mellitus, OGTT – Oral Glucose Tolerance Test, OR – odds ratio, PA – physical activity, RCT – randomized controlled trial, RR – relative risk, SD – Standard Deviation, SE – Standard Error, SES – socioeconomic status, SSB – Sugar sweetened beverage, T1/T2DM – Type 1 or Type 2 Diabetes Mellitus,

**Table S4.** Natural odds ratio (lnOR) values before back-transformation correspond to Figures 3A, 3B, 4A, 4B, 5 and 6.

|           | Study                          | lnOR  | 95 % Confidence Intervals |       |
|-----------|--------------------------------|-------|---------------------------|-------|
|           |                                |       | Lower                     | Upper |
| Figure 3A | Badon et al. 2016 [39]         | -0.64 | -1.18                     | -0.11 |
|           | Chasan-Taber et al. 2008 [56]  | -0.22 | -1.43                     | 0.99  |
|           | Chasan-Taber et al. 2014 [55]  | -0.24 | -1.12                     | 0.65  |
|           | Currie et al. 2014 [59]        | -0.51 | -1.37                     | 0.35  |
|           | Dempsey et al. 2004 [40]       | -1.76 | -2.69                     | -0.83 |
|           | Morkrid et al. 2014 [61]       | -0.37 | -0.70                     | -0.05 |
|           | Solomon et al. 1997 [32]       | -0.04 | -0.30                     | 0.21  |
|           | Van der Ploeg et al. 2011 [48] | 0.08  | -0.35                     | 0.50  |
|           | Zhang et al. 2006 [36]         | -0.36 | -0.54                     | -0.19 |
|           | Oken et al. 2006 [49]          | -0.58 | -1.12                     | -0.04 |
|           | Rudra et al. 2006 [44]         | -0.46 | -1.34                     | 0.42  |
| OVERALL   | -0.36                          | -0.57 | -0.16                     |       |
| Figure 3B | Badon et al. 2016 [39]         | -0.56 | -1.04                     | -0.08 |
|           | Chasan-Taber et al. 2008 [56]  | -0.36 | -1.33                     | 0.61  |
|           | Chasan-Taber et al. 2014 [55]  | -0.37 | -1.26                     | 0.52  |
|           | Currie et al. 2014 [59]        | -0.58 | -1.49                     | 0.33  |
|           | Dempsey et al. 2004 [40]       | -0.35 | -1.04                     | 0.35  |
|           | Dye et al. 1997 [52]           | 0.00  | -0.22                     | 0.22  |
|           | Morkrid et al. 2014 [61]       | -0.30 | -0.67                     | 0.07  |
|           | Oken et al. 2006 [49]          | -0.11 | -0.70                     | 0.49  |
|           | OVERALL                        | -0.24 | -0.45                     | -0.03 |
| Figure 4A | Badon et al. 2016 [39]         | -0.64 | -1.18                     | -0.11 |
|           | Chasan-Taber et al. 2008 [56]  | 0.74  | -0.43                     | 1.92  |
|           | Chasan-Taber et al. 2014 [55]  | 0.23  | -0.63                     | 1.09  |
|           | Rudra et al. 2006 [44]         | -1.71 | -2.64                     | -0.77 |
|           | Dempsey et al. 2004 [40]       | -0.37 | -0.70                     | -0.05 |
|           | Morkrid et al. 2014 [61]       | -1.97 | -2.86                     | -1.07 |
|           | Solomon et al. 1997 [32]       | -0.04 | -0.30                     | 0.21  |
|           | Van der Ploeg et al. 2011 [48] | 0.20  | -0.22                     | 0.62  |
|           | Zhang et al. 2006 [36]         | -0.36 | -0.53                     | -0.19 |
|           | Oken et al. 2006 [49]          | -0.58 | -1.12                     | -0.04 |
|           | OVERALL                        | -0.43 | -0.86                     | 0.00  |

|           |                                |       |       |       |
|-----------|--------------------------------|-------|-------|-------|
| Figure 4B | Badon et al. 2016 [39]         | -0.67 | -1.16 | -0.18 |
|           | Chasan-Taber et al. 2008 [56]  | -0.36 | -1.50 | 0.79  |
|           | Chasan-Taber et al. 2014 [55]  | 0.07  | -0.68 | 0.82  |
|           | Dempsey et al. 2004 [40]       | -0.63 | -1.39 | 0.13  |
|           | Oken et al. 2006 [49]          | -0.11 | -0.70 | 0.49  |
|           | OVERALL                        | -0.37 | -0.70 | -0.04 |
| Figure 5  | Badon et al. 2014 [39]         | -0.64 | -1.18 | -0.11 |
|           | Dempsey et al. 2004 [40]       | -1.71 | -2.64 | -0.77 |
|           | Rudra et al. 2006 [44]         | -1.97 | -2.86 | -1.07 |
|           | Solomon et al. 1997 [32]       | -0.04 | -0.30 | 0.21  |
|           | Van der Ploeg et al. 2011 [48] | 0.20  | -0.22 | 0.62  |
|           | Zhang et al. 2006 [36]         | -0.36 | -0.53 | -0.19 |
|           | OVERALL                        | -0.66 | -1.32 | -0.00 |
| Figure 6  | Badon et al. 2014 [39]         | -0.64 | -1.18 | -0.11 |
|           | Dempsey et al. 2004 [40]       | -1.71 | -2.64 | -0.77 |
|           | Morkrid et al. 2014 [61]       | -0.37 | -0.70 | -0.05 |
|           | Solomon et al. 1997 [32]       | -0.27 | -0.76 | 0.22  |
|           | OVERALL                        | -0.62 | -1.09 | -0.14 |

**Figure S1:** Assessing the risk of publication bias using funnel plots for different metaanalyses. InOR, natural log odds ratio

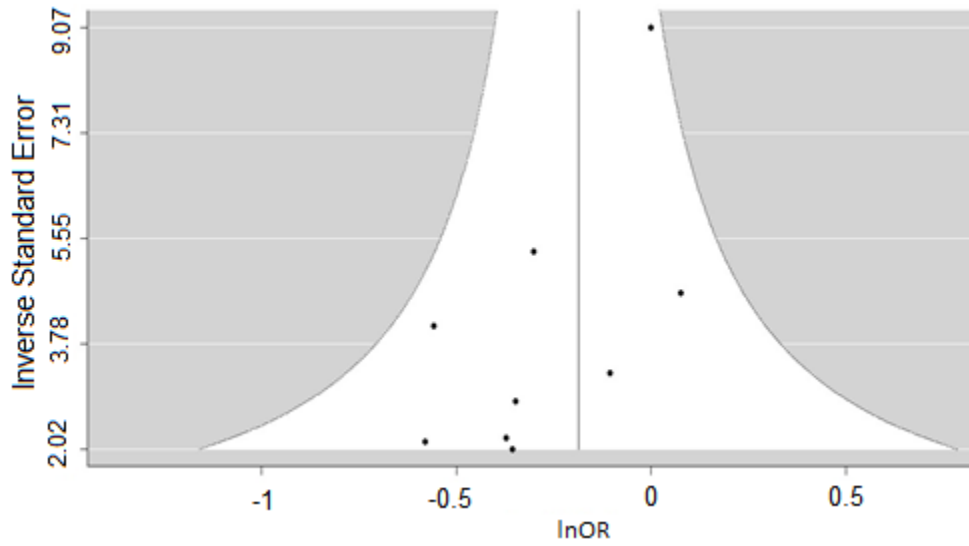

Figure S1a. Any type of PA in early pregnancy versus none (n studies = 9, z = -0.65, p = 0.52).

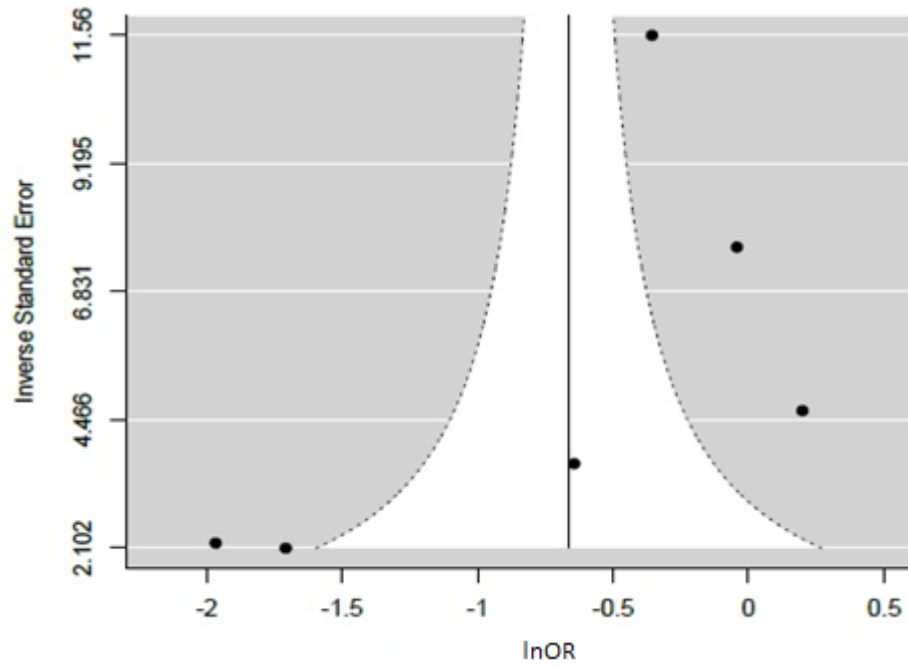

Figure S1b. Pre-pregnancy LTPA high versus none reported in MET.hr/wk (n studies = 6, z = -2.96, p = 0.003).

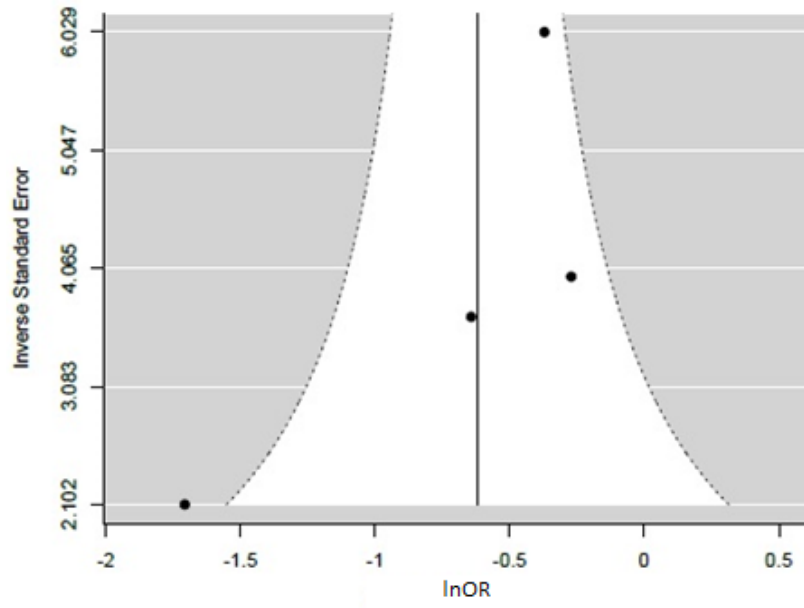

Figure S1c. Pre-pregnancy LTPA high versus none levels reported in hr/wk, (n studies = 4, z = -2.34, p = 0.02). Due to insufficient number of studies reporting on early pregnancy
